# Supplementary material for: Regional Differences in Prescribing Patterns of Metamizole in Germany Based on Data from 70 Million Persons
Source: MDPI journal article supplement (doi:10.3390/ijerph17113892), 2020-05-30
Supplement: s1 [file s1]

# Regional differences in prescribing patterns of metamizole in Germany based on data from 70 million persons

Falk Hoffmann, Carsten Bantel, Frederik Tilmann von Rosen and Kathrin Jobski

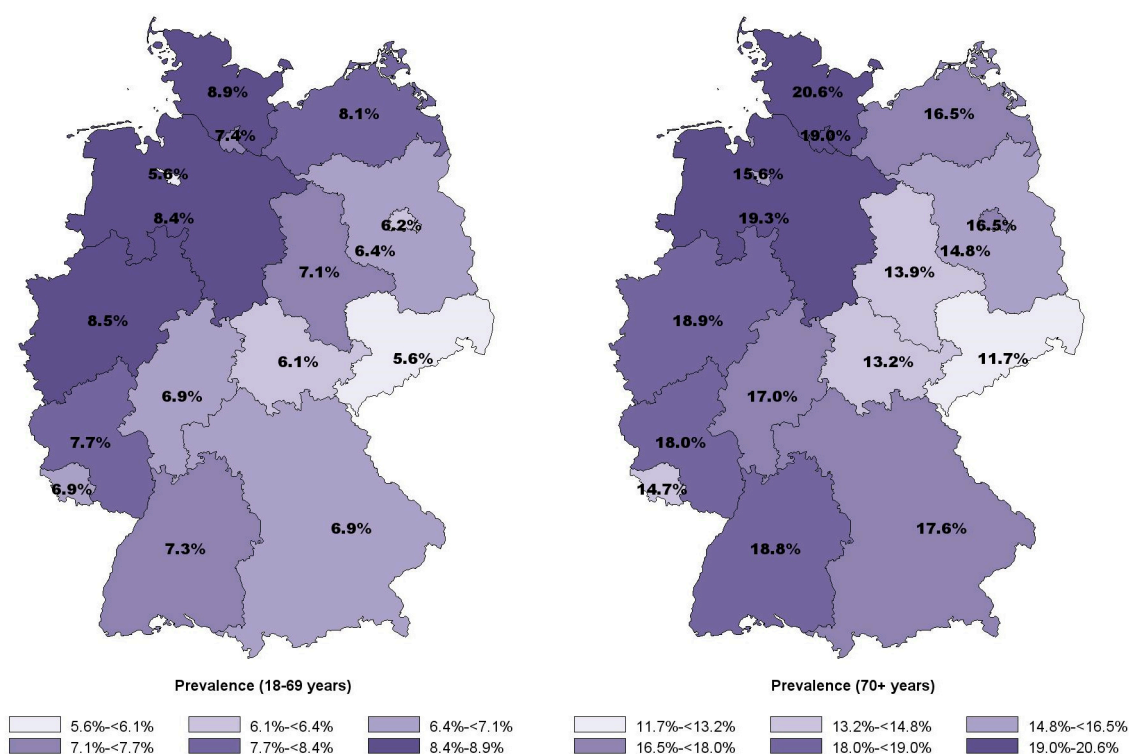

**Supplemental Figure S1.** Proportion of adults with at least one prescription of metamizole in 2010 by state and age
